# Supplementary material for: Proteomics analysis reveals differential acclimation of coastal and oceanic Synechococcus to climate warming and iron limitation
Source: Front Microbiol. 2024 Feb 20;15:1323499. doi: 10.3389/fmicb.2024.1323499 (PMC10912551; doi:10.3389/fmicb.2024.1323499)
Supplement: Supplementary file 3 [file Table_3.XLSX]

## Sheet: YX04-1
Supplementary Table 3
Sheet 1: YX04-1 proteins in the shared Fe lim, warm Fe lim, and unique interaction response categories
KO	KO Name	BLAST	Direction	Functional category	27L1	27L2	27L3	30L1	30L2	30L3	27R1	27R2	27R3	30R1	30R2	30R3
The shared Fe limitation response: Shared between 27Lvs27R, 30Lvs30R, and 30Lvs27R (94 proteins)
K00940	nucleoside-diphosphate kinase	MULTISPECIES: nucleoside-diphosphate kinase	Increased	Purines, pyrimidines, nucleotides	78.933	67.993	43.74	69.973	38.653	52.708	21.196	22.686	19.787	16.359	13.973	24.301
K02637	cytochrome b6-f complex subunit 4	MULTISPECIES: cytochrome b6-f complex subunit IV	Increased	Photosynthesis	27.806	19.682	23.021	28.581	24.158	20.497	0	0	0	5.7738	0	8.8366
K05380	phycoerythrin-associated linker protein	phycobilisome rod-core linker polypeptide	Increased	Photosynthesis	200.92	229.03	272.8	223.72	234.34	190.33	79.487	87.502	86.844	74.098	75.977	88.366
K03530	DNA-binding protein HU-beta	MULTISPECIES: HU family DNA-binding protein	Increased	Regulatory system and stress	52.921	49.205	74.818	57.161	65.228	59.54	20.137	21.605	21.986	17.322	15.719	20.987
K02838	ribosome recycling factor	ribosome recycling factor	Increased	Translation	47.539	43.837	61.006	55.19	56.772	55.636	26.496	20.525	24.184	20.208	17.466	22.092
K02012	iron(III) transport system substrate-binding protein	extracellular solute-binding protein	Increased	Transporters	313.04	310.44	361.43	276.94	231.92	293.8	18.017	20.525	15.39	23.095	22.706	24.301
K02109	F-type H+-transporting ATPase subunit b	F0F1 ATP synthase subunit B;MULTISPECIES: F0F1 ATP synthase subunit B'	Increased	Photosynthesis	54.715	47.416	69.063	65.046	78.514	60.516	23.316	27.007	23.085	25.982	20.959	23.196
K07267	porin	iron uptake porin;MAG: porin	Increased	Transporters	747.178	664.719	855.232	698.746	680.05	693.006	102.803	119.914	95.6391	114.515	110.913	145.807
K19220	peptidoglycan DL-endopeptidase CwlS	iron uptake porin	Increased	Transporters	333.67	317.6	433.95	426.74	460.22	399.21	115.52	122.07	107.73	118.36	110.04	145.8
LKDHAOIP_02385	hypothetical protein	hypothetical protein	Increased	unknown	69.067	57.257	67.912	48.291	47.109	47.827	25.436	23.766	20.887	21.171	18.339	27.614
K00003	homoserine dehydrogenase	homoserine dehydrogenase	Decreased	Amino acid metabolism	3.5879	0	0	0	0	0	16.957	12.963	17.589	19.246	20.959	15.464
K00052	3-isopropylmalate dehydrogenase	3-isopropylmalate dehydrogenase	Decreased	Amino acid metabolism	3.5879	0	0	0	0	0	13.778	17.284	13.192	17.322	16.593	17.673
K00053	ketol-acid reductoisomerase	ketol-acid reductoisomerase	Decreased	Amino acid metabolism	17.939	16.998	14.964	16.754	18.119	16.593	42.393	48.612	43.972	52.927	51.525	44.183
K00600	glycine hydroxymethyltransferase	serine hydroxymethyltransferase	Decreased	Amino acid metabolism	11.661	14.314	0	12.812	14.495	11.713	40.273	38.89	41.773	43.304	34.932	37.556
K00766	anthranilate phosphoribosyltransferase	anthranilate phosphoribosyltransferase family protein;anthranilate phosphoribosyltransferase	Decreased	Amino acid metabolism	4.4848	0	0	0	0	0	19.0768	14.0435	17.5888	22.133	18.3393	11.0458
K00800	3-phosphoshikimate 1-carboxyvinyltransferase	3-phosphoshikimate 1-carboxyvinyltransferase	Decreased	Amino acid metabolism	0	3.5786	0	0	0	0	12.718	18.365	13.192	16.359	13.973	12.15
K01251	adenosylhomocysteinase	adenosylhomocysteinase	Decreased	Amino acid metabolism	7.1757	9.8411	0	2.9566	0	0	26.496	29.167	30.78	26.945	26.199	17.673
K01586	diaminopimelate decarboxylase	diaminopimelate decarboxylase	Decreased	Amino acid metabolism	0	0	0	0	0	0	10.598	11.883	10.993	10.585	7.8597	5.5229
K01696	tryptophan synthase beta chain	tryptophan synthase subunit beta	Decreased	Amino acid metabolism	0	0	0	0	0	0	12.718	10.803	13.192	10.585	7.8597	6.6275
K01940	argininosuccinate synthase	argininosuccinate synthase	Decreased	Amino acid metabolism	5.3818	5.3678	0	0	0	0	23.316	23.766	20.887	28.869	25.326	26.51
K10206	LL-diaminopimelate aminotransferase	LL-diaminopimelate aminotransferase	Decreased	Amino acid metabolism	2.6909	3.5786	0	3.9422	0	0	18.017	17.284	17.589	19.246	19.213	13.255
K00645	S-malonyltransferase	ACP S-malonyltransferase	Decreased	Cell wall and signaling	0	4.4732	0	0	0	0	11.658	15.124	12.092	10.585	11.353	12.15
K01627	2-dehydro-3-deoxyphosphooctonate aldolase (KDO 8-P synthase)	3-deoxy-8-phosphooctulonate synthase	Decreased	Cell wall and signaling	2.6909	0	0	0	0	0	15.897	16.204	14.291	16.359	14.846	12.15
K03070	preprotein translocase subunit SecA	preprotein translocase subunit SecA	Decreased	Cell wall and signaling	12.558	10.736	0	0	0	0	51.931	47.532	67.057	41.379	52.398	28.719
K03609	septum site-determining protein MinD	MULTISPECIES: septum site-determining protein MinD	Decreased	Cell wall and signaling	25.115	21.471	19.568	13.798	12.079	19.521	47.692	49.692	51.667	47.153	48.031	46.392
K18855	UDP-N-acetylglucosamine 3-dehydrogenase	Gfo/Idh/MocA family oxidoreductase	Decreased	Cell wall and signaling	0	0	0	0	0	0	10.5982	12.9632	13.1916	16.3592	17.466	9.9412
K02469	DNA gyrase subunit A	DNA topoisomerase 4 subunit A;DNA gyrase subunit A	Decreased	DNA	10.764	9.8411	4.6042	6.8988	4.8317	4.8803	46.6324	43.2103	48.3691	46.1908	50.651	43.0787
K02470	DNA gyrase subunit B	DNA topoisomerase (ATP-hydrolyzing) subunit B	Decreased	DNA	4.4848	0	0	0	0	0	14.838	16.204	20.887	28.869	23.579	14.359
K03168	DNA topoisomerase I	type I DNA topoisomerase	Decreased	DNA	8.0727	6.2625	2.3021	0	0	0	21.196	25.926	26.383	27.907	30.565	23.196
K02338	DNA polymerase III subunit beta	DNA polymerase III subunit beta	Decreased	DNA	0	0	0	0	0	0	14.838	15.124	20.887	18.284	18.339	15.464
K00324	H+-translocating NAD(P) transhydrogenase subunit alpha	Re/Si-specific NAD(P)(+) transhydrogenase subunit alpha	Decreased	Energy and redox	11.661	7.1571	0	8.8698	0	0	21.196	20.525	23.085	25.982	22.706	15.464
K01507	inorganic pyrophosphatase	inorganic diphosphatase	Decreased	Energy and redox	11.661	11.63	6.9063	11.826	8.4554	11.713	29.675	33.488	30.78	27.907	31.4386	29.824
K05579	NAD(P)H-quinone oxidoreductase subunit H	NAD(P)H-quinone oxidoreductase subunit H	Decreased	Energy and redox	0	3.5786	0	0	0	0	19.077	21.605	19.787	26.945	28.819	22.092
K22405	NADH oxidase (H2O-forming)	flavin reductase	Decreased	Energy and redox	0	0	0	0	0	0	15.8973	12.9635	13.1916	18.2842	18.3397	15.4641
K03692	glucosylglycerol-phosphate synthase	glucosylglycerol-phosphate synthase	Decreased	Other metabolites	2.6909	3.5786	0	0	0	1.9521	15.897	12.963	19.787	18.284	19.213	12.15
K16881	mannose-1-phosphate guanylyltransferase / phosphomannomutase	NDP-sugar synthase	Decreased	Other metabolites	0	0	0	0	0	0	12.718	10.803	13.192	12.51	13.973	9.9412
K00228	coproporphyrinogen III oxidase	oxygen-dependent coproporphyrinogen oxidase	Decreased	Photosynthesis	10.764	10.736	8.0573	10.841	10.871	8.7846	33.914	32.408	35.177	35.605	33.185	28.719
K01599	uroporphyrinogen decarboxylase	uroporphyrinogen decarboxylase	Decreased	Photosynthesis	0	0	0	0	0	2.9282	29.675	25.926	26.383	26.945	29.692	32.033
K02095	allophycocyanin-B	allophycocyanin	Decreased	Photosynthesis	14.351	14.314	9.2084	9.8554	6.0396	11.713	40.273	36.729	30.78	33.681	34.059	30.928
K02097	phycobilisome core component	allophycocyanin subunit beta	Decreased	Photosynthesis	6.2788	8.0518	0	9.8554	0	0	19.077	23.766	21.986	21.171	20.086	18.778
K02720	photosystem II cytochrome c550	photosystem II cytochrome c-550	Decreased	Photosynthesis	0	0	0	0	0	0	16.957	14.043	15.39	14.435	13.099	11.046
K03405	magnesium chelatase subunit I	magnesium chelatase ATPase subunit I	Decreased	Photosynthesis	3.5879	6.2625	0	5.9132	0	4.8803	21.196	20.525	27.482	25.02	27.072	17.673
K04755	ferredoxin, 2Fe-2S	2Fe-2S iron-sulfur cluster-binding protein	Decreased	Photosynthesis	0	8.0518	0	0	0	0	23.316	22.686	23.085	21.171	23.579	26.51
K10960	geranylgeranyl diphosphate/geranylgeranyl-bacteriochlorophyllide a reductase	geranylgeranyl reductase	Decreased	Photosynthesis	0	0	0	0	0	0	19.077	12.963	19.787	10.585	13.973	7.732
K00254	dihydroorotate dehydrogenase	quinone-dependent dihydroorotate dehydrogenase	Decreased	Purines, pyrimidines, nucleotides	0	3.5786	0	0	0	0	11.658	10.803	13.192	13.472	11.353	12.15
K00602	phosphoribosylaminoimidazolecarboxamide formyltransferase / IMP cyclohydrolase	MAG: bifunctional phosphoribosylaminoimidazolecarboxamide formyltransferase/IMP cyclohydrolase	Decreased	Purines, pyrimidines, nucleotides	6.2788	6.2625	5.7552	3.9422	0	4.8803	27.555	27.007	25.284	35.605	36.678	32.033
K01756	adenylosuccinate lyase	adenylosuccinate lyase	Decreased	Purines, pyrimidines, nucleotides	5.3818	6.2625	0	2.9566	0	0	18.017	14.043	15.39	18.284	19.213	17.673
K01939	adenylosuccinate synthase	adenylosuccinate synthase	Decreased	Purines, pyrimidines, nucleotides	0	0	0	0	0	0	13.778	15.124	20.887	22.133	20.086	14.359
K01955	carbamoyl-phosphate synthase large subunit	carbamoyl-phosphate synthase large subunit	Decreased	Purines, pyrimidines, nucleotides	0	0	0	0	0	0	8.4786	9.7224	14.291	20.208	18.339	7.732
K03526	(E)-4-hydroxy-3-methylbut-2-enyl-diphosphate synthase	(E)-4-hydroxy-3-methylbut-2-enyl-diphosphate synthase	Decreased	Purines, pyrimidines, nucleotides	0	1.7893	0	0	0	0	28.615	24.846	30.78	24.058	28.819	22.092
K06118	UDP-sulfoquinovose synthase	NAD-dependent epimerase/dehydratase family protein	Decreased	Purines, pyrimidines, nucleotides	17.042	15.209	6.9063	9.8554	10.871	14.641	31.795	28.087	38.475	32.718	33.185	26.51
K03687	molecular chaperone GrpE	nucleotide exchange factor GrpE	Decreased	Regulatory system and stress	0	0	0	0	0	0	11.658	14.043	10.993	16.359	13.973	12.15
K03695	ATP-dependent Clp protease ATP-binding subunit ClpB	AAA family ATPase;ATP-dependent chaperone ClpB	Decreased	Regulatory system and stress	13.455	13.42	16.115	13.798	18.119	15.617	38.153	32.4084	35.177	51.003	48.032	41.974
K04079	molecular chaperone HtpG	molecular chaperone HtpG	Decreased	Regulatory system and stress	0	0	0	0	0	0	14.838	10.803	15.39	22.133	20.959	12.15
K08482	circadian clock protein KaiC	circadian clock protein KaiC	Decreased	Regulatory system and stress	17.939	15.209	2.3021	3.9422	0	3.9043	46.632	44.291	49.468	47.153	43.665	44.183
K10697	two-component system, OmpR family, response regulator RpaA	response regulator	Decreased	Regulatory system and stress	0	2.6839	0	0	0	0	14.838	16.204	15.39	11.548	14.846	14.359
K11329	two-component system, OmpR family, response regulator RpaB	MULTISPECIES: response regulator	Decreased	Regulatory system and stress	14.351	15.209	9.2084	14.783	12.079	13.665	31.7945	41.0498	38.4755	36.5676	39.2981	30.9283
K14055	universal stress protein E	universal stress protein	Decreased	Regulatory system and stress	19.733	13.42	8.0573	4.9277	0	4.8803	30.735	27.007	34.078	20.208	27.946	26.51
K00030	isocitrate dehydrogenase (NAD+)	NADP-dependent isocitrate dehydrogenase	Decreased	Respiration	17.939	20.577	3.4531	14.783	8.4554	21.474	29.675	29.167	32.979	33.681	34.059	32.033
K00033	6-phosphogluconate dehydrogenase	NADP-dependent phosphogluconate dehydrogenase	Decreased	Respiration	5.3818	1.7893	0	4.9277	0	0	16.957	14.043	19.787	9.6231	20.086	9.9412
K00161	pyruvate dehydrogenase E1 component alpha subunit	pyruvate dehydrogenase (acetyl-transferring) E1 component subunit alpha	Decreased	Respiration	5.3818	6.2625	0	0	0	0	18.017	18.365	19.787	16.359	19.213	14.359
K00615	transketolase	transketolase	Decreased	Respiration	22.424	22.366	14.964	8.8698	8.4554	5.8564	71.008	63.736	72.553	59.663	62.877	53.02
K00703	starch synthase	glycogen synthase GlgA	Decreased	Respiration	7.1757	5.3678	3.4531	6.8988	8.4554	9.7607	36.034	29.167	39.575	32.718	33.185	36.451
K00873	pyruvate kinase	pyruvate kinase	Decreased	Respiration	0	0	0	0	0	0	12.718	12.963	12.092	13.472	13.099	11.046
K01595	phosphoenolpyruvate carboxylase	phosphoenolpyruvate carboxylase	Decreased	Respiration	0	2.6839	0	0	0	0	22.256	23.766	32.979	28.869	31.439	19.882
K01682	aconitate hydratase 2 / 2-methylisocitrate dehydratase	bifunctional aconitate hydratase 2/2-methylisocitrate dehydratase	Decreased	Respiration	0	0	0	0	0	0	13.778	12.963	10.993	7.6985	12.226	5.5229
K01835	phosphoglucomutase	alpha-D-glucose phosphate-specific phosphoglucomutase	Decreased	Respiration	3.5879	6.2625	0	0	0	0	25.436	18.365	20.887	18.284	19.213	15.464
K01895	acetyl-CoA synthetase	acetate--CoA ligase	Decreased	Respiration	10.764	8.9464	3.4531	2.9566	0	2.9282	23.316	24.846	29.681	35.605	30.565	24.301
K00284	glutamate synthase (ferredoxin)	glutamate synthase large subunit	Decreased	S and N metabolism	7.1757	7.1571	0	0	0	0	25.436	19.445	35.177	25.02	29.692	19.882
K00366	ferredoxin-nitrite reductase	ferredoxin--nitrite reductase	Decreased	S and N metabolism	40.364	44.732	24.172	20.696	19.327	13.665	92.205	97.224	104.43	102	89.95	102.73
K00392	sulfite reductase (ferredoxin)	MAG: sulfite reductase subunit beta	Decreased	S and N metabolism	0	4.4732	0	0	0	0	19.077	17.284	23.085	17.322	22.706	14.359
K00962	polyribonucleotide nucleotidyltransferase	polyribonucleotide nucleotidyltransferase	Decreased	Transcription	44.848	41.153	21.87	35.479	31.406	35.138	130.36	122.07	146.21	118.36	116.15	111.56
K03043	DNA-directed RNA polymerase subunit beta	DNA-directed RNA polymerase subunit beta	Decreased	Transcription	50.23	60.836	20.719	47.306	55.564	47.827	108.1	103.71	119.82	122.21	110.04	97.203
K03046	DNA-directed RNA polymerase subunit beta'	DNA-directed RNA polymerase subunit beta';DNA-directed RNA polymerase subunit gamma	Decreased	Transcription	43.952	49.205	18.4172	38.436	37.445	33.1867	163.212	144.755	184.683	172.255	151.951	144.7
K12573	ribonuclease R	RNB domain-containing ribonuclease	Decreased	Transcription	0	0	0	0	0	0	19.077	14.043	27.482	19.246	17.466	9.9412
K12574	ribonuclease J	RNase J family beta-CASP ribonuclease	Decreased	Transcription	0	0	0	0	0	0	22.256	16.204	26.383	21.171	19.213	15.464
K01255	leucyl aminopeptidase	leucyl aminopeptidase	Decreased	Translation	0	3.5786	0	0	0	1.9521	15.897	11.883	12.092	11.548	13.973	13.255
K01868	threonyl-tRNA synthetase	threonine--tRNA ligase	Decreased	Translation	0	0	0	0	0	0	9.5384	11.883	10.993	9.6231	11.353	8.8366
K01876	aspartyl-tRNA synthetase	aspartate--tRNA ligase	Decreased	Translation	3.5879	0	0	0	0	0	11.658	16.204	23.085	25.02	18.339	14.359
K01879	glycyl-tRNA synthetase beta chain	glycine--tRNA ligase subunit beta	Decreased	Translation	2.6909	7.1571	0	2.9566	0	0	23.316	23.766	30.78	31.756	30.565	28.719
K02434	aspartyl-tRNA(Asn)/glutamyl-tRNA(Gln) amidotransferase subunit B	Asp-tRNA(Asn)/Glu-tRNA(Gln) amidotransferase subunit GatB	Decreased	Translation	12.558	13.42	6.9063	9.8554	8.4554	10.737	30.735	23.766	26.383	26.945	27.072	23.196
K02518	translation initiation factor IF-1	MULTISPECIES: translation initiation factor IF-1	Decreased	Translation	0	2.6839	0	0	0	0	10.598	12.963	10.993	10.585	11.353	11.046
K02519	translation initiation factor IF-2	translation initiation factor IF-2	Decreased	Translation	1.7939	2.6839	0	0	0	0	26.496	25.926	29.681	32.718	30.565	19.882
K02520	translation initiation factor IF-3	translation initiation factor IF-3	Decreased	Translation	8.0727	9.8411	4.6042	9.8554	7.2475	7.8086	32.854	32.408	30.78	39.455	34.932	35.346
K02890	large subunit ribosomal protein L22	50S ribosomal protein L22	Decreased	Translation	0	0	0	0	0	0	12.718	17.284	9.8937	20.208	19.213	14.359
K02994	small subunit ribosomal protein S8	MULTISPECIES: 30S ribosomal protein S8	Decreased	Translation	0	0	0	0	0	0	19.077	18.365	16.489	18.284	18.339	19.882
K03545	trigger factor	trigger factor	Decreased	Translation	10.764	13.42	0	0	0	0	39.213	41.05	39.575	25.02	32.312	17.673
K05520	protease I	DJ-1/PfpI family protein	Decreased	Translation	0	0	0	0	0	0	13.778	12.963	6.5958	10.585	13.973	13.255
K06207	GTP-binding protein	translational GTPase TypA	Decreased	Cell wall and signaling	0	1.7893	0	0	0	0	14.838	15.124	23.085	14.435	18.339	7.732
K09667	protein O-GlcNAc transferase	tetratricopeptide repeat protein;glycosyltransferase	Decreased	Translation	0	0	0	0	0	0	27.5554	33.4885	38.4761	32.7184	38.4254	22.0915
LKDHAOIP_00219	hypothetical protein	MULTISPECIES: hypothetical protein	Decreased	unknown	0	0	0	0	0	0	13.778	15.124	13.192	10.585	12.226	17.673
LKDHAOIP_01514	hypothetical protein	IMS domain-containing protein	Decreased	unknown	2.6909	0	0	0	0	0	28.615	25.926	29.681	25.02	30.565	23.196
LKDHAOIP_02012	hypothetical protein	F420-0:Gamma-glutamyl ligase	Decreased	unknown	3.5879	6.2625	0	0	0	0	14.838	10.803	19.787	14.435	19.213	12.15
LKDHAOIP_02179	hypothetical protein	hypothetical protein	Decreased	unknown	0	0	0	0	0	0	15.897	11.883	15.39	11.548	10.48	14.359
The warm Fe limitation response: Shared only between 30Lvs30R and 30Lvs27R (58 proteins)
K02639	ferredoxin	2Fe-2S iron-sulfur cluster-binding protein;MULTISPECIES: 2Fe-2S iron-sulfur cluster-binding protein	Increased	Photosynthesis				41.393	62.812	46.851	16.9576	20.525	16.489	13.472	12.2266	15.464
K08903	photosystem II 13kDa protein	photosystem II reaction center protein Psb28	Increased	Photosynthesis				38.436	33.822	36.115	15.897	17.284	15.39	16.359	14.846	18.778
K03386	peroxiredoxin 2/4	MULTISPECIES: redoxin domain-containing protein	Increased	Regulatory system and stress				127.13	154.61	145.43	54.051	56.174	56.064	62.55	52.398	74.007
K04078	chaperonin GroES	MULTISPECIES: co-chaperone GroES	Increased	Regulatory system and stress				77.858	93.01	95.655	32.854	33.488	31.88	32.718	29.692	37.556
K02902	large subunit ribosomal protein L28	50S ribosomal protein L28	Increased	Translation				24.638	28.99	25.378	8.4786	6.4816	8.7944	8.6608	7.8597	9.9412
K02935	large subunit ribosomal protein L7/L12	MULTISPECIES: 50S ribosomal protein L7/L12	Increased	Translation				69.973	91.802	72.229	29.675	31.328	28.582	29.832	25.326	36.451
K02965	small subunit ribosomal protein S19	MULTISPECIES: 30S ribosomal protein S19	Increased	Translation				24.638	30.198	22.45	11.658	11.883	12.092	12.51	8.733	11.046
K03217	YidC/Oxa1 family membrane protein insertase	membrane protein insertase YidC	Increased	Translation				18.725	15.703	13.665	6.3589	6.4816	6.5958	5.7738	5.2398	7.732
LKDHAOIP_00006	hypothetical protein	hypothetical protein	Increased	unknown				19.711	27.782	18.545	8.4786	7.5619	9.8937	8.6608	7.8597	6.6275
LKDHAOIP_00700	hypothetical protein	DUF805 domain-containing protein	Increased	unknown				20.696	22.95	24.402	7.4188	8.6421	8.7944	6.7362	5.2398	9.9412
LKDHAOIP_02230	hypothetical protein	CAAD domain-containing protein	Increased	unknown				31.537	36.238	28.306	15.897	14.043	15.39	16.359	13.973	14.359
K00812	aspartate aminotransferase	pyridoxal phosphate-dependent aminotransferase	Decreased	Amino acid metabolism				0	0	0	8.4786	8.6421	9.8937	8.6608	9.6063	9.9412
K00826	branched-chain amino acid aminotransferase	branched-chain amino acid transaminase	Decreased	Amino acid metabolism				7.8843	0	3.9043	16.957	12.963	10.993	13.472	17.466	15.464
K00872	homoserine kinase	homoserine kinase	Decreased	Amino acid metabolism				0	0	0	8.4786	8.6421	9.8937	7.6985	8.733	9.9412
K01649	2-isopropylmalate synthase	2-isopropylmalate synthase	Decreased	Amino acid metabolism				0	0	0	7.4188	8.6421	13.192	13.472	13.099	6.6275
K01733	threonine synthase	MAG: threonine synthase	Decreased	Amino acid metabolism				2.9566	2.4158	1.9521	13.778	15.124	15.39	17.322	13.973	12.15
K24259	putative aminotransferase	N-acetyl sugar amidotransferase	Decreased	Amino acid metabolism				0	0	0	9.5384	9.7224	10.993	8.6608	12.226	8.8366
K00059	3-oxoacyl- reductase	3-oxoacyl-[acyl-carrier-protein] reductase	Decreased	Cell wall and signaling				0	0	0	11.658	12.963	9.8937	12.51	13.099	15.464
K00648	3-oxoacyl- synthase III	ketoacyl-ACP synthase III	Decreased	Cell wall and signaling				10.841	7.2475	0	20.137	14.043	15.39	18.284	18.339	16.569
K01791	UDP-N-acetylglucosamine 2-epimerase (non-hydrolysing)	MAG: UDP-N-acetylglucosamine 2-epimerase (non-hydrolyzing)	Decreased	Cell wall and signaling				0	0	4.8803	15.897	10.803	15.39	15.397	16.593	17.673
K01897	long-chain acyl-CoA synthetase	AMP-binding protein	Decreased	Cell wall and signaling				0	0	0	8.4786	8.6421	9.8937	11.548	10.48	8.8366
K01921	D-alanine-D-alanine ligase	D-alanine--D-alanine ligase	Decreased	Cell wall and signaling				0	0	0	7.4188	6.4816	12.092	8.6608	6.9864	7.732
K02666	type IV pilus assembly protein PilQ	type IV pilus assembly protein PilQ	Decreased	Cell wall and signaling				0	0	0	16.957	18.365	14.291	8.6608	10.48	8.8366
K03110	fused signal recognition particle receptor	signal recognition particle-docking protein FtsY	Decreased	Cell wall and signaling				0	0	0	8.4786	14.043	8.7944	11.548	10.48	9.9412
K03621	phosphate acyltransferase	phosphate acyltransferase PlsX	Decreased	Cell wall and signaling				0	0	0	10.598	8.6421	9.8937	11.548	13.973	7.732
K09458	3-oxoacyl- synthase II	beta-ketoacyl-ACP synthase II	Decreased	Cell wall and signaling				0	0	0	13.778	9.7224	9.8937	13.472	12.226	7.732
K11003	membrane fusion protein, hemolysin D	HlyD family efflux transporter periplasmic adaptor subunit	Decreased	Cell wall and signaling				8.8698	4.8317	4.8803	23.316	23.766	24.184	24.058	22.706	18.778
K05580	NAD(P)H-quinone oxidoreductase subunit I	NAD(P)H-quinone oxidoreductase subunit I	Decreased	Energy and redox				0	0	0	14.838	16.204	12.092	11.548	14.846	15.464
K01698	porphobilinogen synthase	porphobilinogen synthase	Decreased	Photosynthesis				10.841	3.6238	11.713	23.316	22.686	19.787	17.322	21.832	15.464
K02094	phycobilisome core linker protein	phycobilisome linker polypeptide	Decreased	Photosynthesis				6.8988	0	0	15.897	17.284	17.589	14.435	13.973	17.673
K02693	photosystem I subunit IV	MULTISPECIES: photosystem I reaction center subunit IV	Decreased	Photosynthesis				0	0	0	8.4786	11.883	7.6951	10.585	12.226	16.569
K00856	adenosine kinase	adenosine kinase	Decreased	Purines, pyrimidines, nucleotides				0	0	0	12.718	8.6421	10.993	11.548	13.099	9.9412
K01945	phosphoribosylamine---glycine ligase	phosphoribosylamine--glycine ligase	Decreased	Purines, pyrimidines, nucleotides				0	0	0	7.4188	7.5619	10.993	12.51	13.973	13.255
K03465	thymidylate synthase (FAD)	FAD-dependent thymidylate synthase	Decreased	Purines, pyrimidines, nucleotides				0	0	0	7.4188	8.6421	8.7944	9.6231	12.226	8.8366
K01358	ATP-dependent Clp protease, protease subunit	MULTISPECIES: ATP-dependent Clp endopeptidase proteolytic subunit ClpP;ATP-dependent Clp endopeptidase proteolytic subunit ClpP;MULTISPECIES: ATP-dependent Clp protease proteolytic subunit;Endopeptidase Clp	Decreased	Regulatory system and stress				16.754	8.4554	26.354	47.692	49.692	37.376	47.1535	50.6511	58.5429
K03696	ATP-dependent Clp protease ATP-binding subunit ClpC	ATP-dependent Clp protease ATP-binding subunit	Decreased	Regulatory system and stress				32.523	33.822	31.234	69.948	68.057	70.355	68.324	66.371	70.693
K03798	cell division protease FtsH	ATP-dependent zinc metalloprotease FtsH	Decreased	Regulatory system and stress				35.4794	20.5347	42.947	72.0684	78.86	72.5534	70.2492	79.47	76.216
K00627	pyruvate dehydrogenase E2 component (dihydrolipoamide acetyltransferase)	2-oxo acid dehydrogenase subunit E2	Decreased	Respiration				9.8554	0	11.713	24.376	25.926	28.582	26.945	27.946	23.196
K01647	citrate synthase	citrate synthase	Decreased	Respiration				0	0	0	7.4188	9.7224	9.8937	9.6231	9.6063	12.15
K01784	UDP-glucose 4-epimerase	NAD-dependent epimerase/dehydratase family protein	Decreased	Respiration				0	0	4.8803	11.658	11.883	12.092	10.585	16.593	11.046
K01803	triosephosphate isomerase (TIM)	triose-phosphate isomerase	Decreased	Respiration				0	0	0	7.4188	12.963	10.993	14.435	14.846	7.732
K00860	adenylylsulfate kinase	adenylyl-sulfate kinase	Decreased	S and N metabolism				7.8843	8.4554	8.7846	15.897	21.605	19.787	20.208	20.959	22.092
K01082	3'(2'), 5'-bisphosphate nucleotidase	3'(2'),5'-bisphosphate nucleotidase CysQ	Decreased	S and N metabolism				0	0	0	7.4188	9.7224	7.6951	9.6231	8.733	7.732
K01428	urease subunit alpha	urease subunit alpha	Decreased	S and N metabolism				5.9132	7.2475	2.9282	18.017	18.365	18.688	16.359	16.593	16.569
K11962	urea transport system ATP-binding protein	urea ABC transporter ATP-binding protein UrtD	Decreased	S and N metabolism				0	0	0	9.5384	8.6421	8.7944	7.6985	7.8597	9.9412
K03684	ribonuclease D	ribonuclease D	Decreased	Transcription				0	0	0	8.4786	7.5619	8.7944	8.6608	6.9864	9.9412
K05592	ATP-dependent RNA helicase DeaD	DEAD/DEAH box helicase	Decreased	Transcription				0	0	0	10.598	7.5619	12.092	16.359	13.973	11.046
K01869	leucyl-tRNA synthetase	leucine--tRNA ligase	Decreased	Translation				0	0	0	10.598	7.5619	9.8937	16.359	13.973	8.8366
K01873	valyl-tRNA synthetase	MAG: valine--tRNA ligase	Decreased	Translation				0	0	0	11.658	8.6421	7.6951	14.435	13.973	5.5229
K01885	glutamyl-tRNA synthetase	glutamate--tRNA ligase	Decreased	Translation				0	0	0	11.658	8.6421	14.291	10.585	12.226	7.732
K02881	large subunit ribosomal protein L18	MULTISPECIES: 50S ribosomal protein L18	Decreased	Translation				0	0	0	14.838	15.124	14.291	15.397	14.846	17.673
K04567	lysyl-tRNA synthetase, class II	lysine--tRNA ligase	Decreased	Translation				0	0	0	8.4786	12.963	8.7944	14.435	19.213	11.046
K01990	ABC-2 type transport system ATP-binding protein	ATP-binding cassette domain-containing protein	Decreased	Transporters				0	0	0	9.5384	10.803	9.8937	11.548	9.6063	9.9412
K06889	uncharacterized protein	alpha/beta fold hydrolase;alpha/beta hydrolase	Decreased	unknown				0	0	3.9043	12.718	9.7224	7.6951	10.5854	16.5929	15.4642
K21919	BTB/POZ domain-containing protein KCTD9	conserved hypothetical protein;pentapeptide repeat-containing protein	Decreased	unknown				3.9422	0	0	14.8375	11.8829	10.993	9.623	12.2262	8.8366
LKDHAOIP_00574	hypothetical protein	MBL fold metallo-hydrolase	Decreased	unknown				12.812	0	16.593	24.376	23.766	20.887	20.208	25.326	24.301
LKDHAOIP_00983	hypothetical protein	MULTISPECIES: hypothetical protein	Decreased	unknown				0	0	0	10.598	10.803	8.7944	8.6608	7.8597	8.8366
LKDHAOIP_01543	hypothetical protein	DUF1254 domain-containing protein	Decreased	unknown				8.8698	0	9.7607	24.376	22.686	19.787	21.171	29.692	36.451
The unique interaction response: Unique to 30Lvs27R (13 proteins)
K00147	glutamate-5-semialdehyde dehydrogenase	glutamate-5-semialdehyde dehydrogenase	Decreased	Amino acid metabolism				0	0	0	7.4188	6.4816	10.993
K00973	glucose-1-phosphate thymidylyltransferase	glucose-1-phosphate thymidylyltransferase RfbA	Decreased	Purines, pyrimidines, nucleotides				0	0	0	8.4786	8.6421	8.7944
K01265	methionyl aminopeptidase	type I methionyl aminopeptidase	Decreased	Translation				3.9422	0	0	8.4786	10.803	8.7944
K01875	seryl-tRNA synthetase	serine--tRNA ligase	Decreased	Translation				0	0	0	9.5384	6.4816	12.092
K01887	arginyl-tRNA synthetase	arginine--tRNA ligase	Decreased	Translation				0	0	0	12.718	8.6421	9.8937
K02286	phycocyanin-associated rod linker protein	phycobilisome rod-core linker polypeptide	Decreased	Photosynthesis				25.624	27.782	21.474	55.111	49.692	53.865
K02536	UDP-3-O- glucosamine N-acyltransferase	UDP-3-O-(3-hydroxymyristoyl)glucosamine N-acyltransferase	Decreased	Cell wall and signaling				0	0	1.9521	10.598	8.6421	9.8937
K02705	photosystem II CP43 chlorophyll apoprotein	photosystem II reaction center protein CP43	Increased	Photosynthesis				90.67	101.47	81.99	44.513	45.371	41.773
K04035	magnesium-protoporphyrin IX monomethyl ester (oxidative) cyclase	magnesium-protoporphyrin IX monomethyl ester (oxidative) cyclase	Decreased	Photosynthesis				0	0	0	10.598	7.5619	7.6951
LKDHAOIP_00112	Ycf48-like protein	photosynthesis system II assembly factor Ycf48	Increased	Photosynthesis				26.61	32.614	24.402	12.718	11.883	14.291
LKDHAOIP_00261	hypothetical protein	Hypothetical protein SynA1528_00095	Decreased	unknown				0	0	0	9.5384	11.883	8.7944
LKDHAOIP_00939	Protein Thf1	photosystem II biogenesis protein Psp29	Decreased	Photosynthesis				0	0	0	9.5384	7.5619	7.6951
LKDHAOIP_02088	hypothetical protein	hypothetical protein	Decreased	unknown				16.754	13.287	15.617	39.213	35.649	31.88

## Sheet: XM-24
Sheet 2: XM-24 proteins in the shared Fe lim, warm Fe lim, and unique interaction response categories
KO	KO Name	BLAST	Direction	Functional category	27L1	27L2	27L3	30L1	30L2	30L3	27R1	27R2	27R3	30R1	30R2	30R3
The shared Fe limitation response: Shared between 27Lvs27R, 30Lvs30R, and 30Lvs27R (17 proteins)
K02012	iron(III) transport system substrate-binding protein	MAG: iron ABC transporter substrate-binding protein	Increased	Transporters	290.06	219.662	232.6	301.74	279.69	254.79	2.406	6.0458	4.6865	6.7002	2.0385	3.3555
K07267	porin	MAG: porin	Increased	Transporters	300.8	263.37	291.83	450.05	404.2	300.69	71.379	63.145	54.229	70.352	69.307	76.338
K00548	5-methyltetrahydrofolate--homocysteine methyltransferase	MAG: methionine synthase	Decreased	Amino acid metabolism	6.7143	6.7244	5.3842	0	0	6.886	15.238	25.527	21.424	20.77	7.1346	15.1
K19223	peptidoglycan DL-endopeptidase LytF	LysM peptidoglycan-binding domain-containing protein	Decreased	Cell wall and signaling	0	0	0	0	0	0	0	8.0611	12.72	10.72	4.0769	10.905
K19813	glucose dehydrogenase	MAG: dehydrogenase;GMC oxidoreductase	Decreased	Energy and redox	0	0	0	0	0	0	0	11.4198	14.0595	10.7202	6.1154	10.9054
K10960	geranylgeranyl diphosphate/geranylgeranyl-bacteriochlorophyllide a reductase	geranylgeranyl reductase	Decreased	Photosynthesis	6.7143	15.69	8.6148	8.5237	10.827	12.624	32.883	52.397	46.865	38.861	37.711	36.911
K03671	thioredoxin 1	MULTISPECIES: thioredoxin domain-containing protein;MULTISPECIES: thioredoxin	Decreased	Regulatory system and stress	5.3715	5.6036	4.3074	0	5.4134	4.5907	10.426	12.763	17.407	19.4301	36.692	23.4884
K00688	glycogen phosphorylase	MAG: glycogen phosphorylase	Decreased	Respiration	12.0858	11.207	10.768	3.4095	3.6089	10.329	20.852	32.2443	44.186	32.1602	9.173	16.7776
K01682	aconitate hydratase 2 / 2-methylisocitrate dehydratase	MAG: bifunctional aconitate hydratase 2/2-methylisocitrate dehydratase	Decreased	Respiration	5.3715	12.328	12.922	10.228	14.436	14.92	49.725	50.382	47.534	36.851	21.404	31.877
K00367	ferredoxin-nitrate reductase	MAG: nitrate reductase catalytic subunit	Decreased	S and N metabolism	0	3.3622	0	0	0	0	6.4161	15.45	18.076	12.06	4.0769	10.905
K03321	sulfate permease, SulP family	MAG: sodium-independent anion transporter	Decreased	S and N metabolism	0	10.0866	11.8453	3.4095	0	10.329	8.8222	24.855	16.068	17.4204	11.2116	13.422
K13195	cold-inducible RNA-binding protein	MAG: RNA-binding protein	Decreased	Transcription	0	11.207	11.845	5.1142	0	8.0337	20.0501	26.1985	28.119	24.7902	24.4617	16.778
K04567	lysyl-tRNA synthetase, class II	MAG: lysine--tRNA ligase	Decreased	Translation	4.0286	0	5.3842	5.1142	0	5.7383	12.03	16.122	11.381	16.75	8.1538	11.744
K09667	protein O-GlcNAc transferase	MAG: hypothetical protein DCO99_07355;MAG: hypothetical protein DCO99_07495;MAG: hypothetical protein DCO99_08875;MAG: hypothetical protein DCO99_05205;MAG: glycosyl transferase	Decreased	Translation	0	5.6037	5.3842	0	0	0	8.8222	16.7938	19.4155	11.3902	3.0577	10.0665
K11004	ATP-binding cassette, subfamily B, bacterial HlyB/CyaB	MAG: peptidase C39;ABC transporter transmembrane domain-containing protein	Decreased	Transporters	20.1427	15.6905	18.3065	0	3.6089	10.329	38.4962	49.7098	35.483	34.1703	24.4614	20.1334
K21993	formate transporter	MULTISPECIES: formate/nitrite transporter family protein	Decreased	Transporters	0	10.087	11.845	0	0	16.067	30.477	46.351	41.509	16.08	18.346	23.489
IKNINDAA_00641	hypothetical protein	carboxysome shell carbonic anhydrase	Decreased	unknown	2.6857	6.7244	13.999	0	0	6.886	10.426	21.496	20.085	10.72	9.173	11.744
The warm Fe limitation response: Shared only between 30Lvs30R and 30Lvs27R (15 proteins)
K00281	glycine dehydrogenase	MAG: glycine dehydrogenase (aminomethyl-transferring)	Decreased	Amino acid metabolism				0	0	4.5907	8.0201	11.42	11.381	10.72	8.1538	14.261
K03585	membrane fusion protein, multidrug efflux system	MAG: efflux RND transporter periplasmic adaptor subunit	Decreased	Cell wall and signaling				0	0	5.7383	7.2181	17.4658	12.051	16.7501	6.1154	10.0665
K02335	DNA polymerase I	MAG: DNA polymerase I	Decreased	DNA				0	0	5.7383	3.2081	15.45	18.076	15.41	6.1154	9.2277
K01442	choloylglycine hydrolase	MAG: hypothetical protein DCO99_01140;MAG: choloylglycine hydrolase	Decreased	Other metabolites				0	0	10.329	13.634	9.4046	16.7375	13.4	13.25	10.905
K21480	heme oxygenase (biliverdin-producing, ferredoxin)	MAG: heme oxygenase	Decreased	Other metabolites				0	0	0	8.8221	13.435	12.72	12.73	10.192	9.2277
K02287	phycocyanin-associated, rod	phycobilisome linker polypeptide	Decreased	Photosynthesis				0	0	11.477	11.228	10.748	16.068	10.72	14.269	13.422
K03701	excinuclease ABC subunit A	MAG: excinuclease ABC subunit A	Decreased	Purines, pyrimidines, nucleotides				10.228	5.4134	22.953	26.466	18.809	27.449	24.121	28.538	26.005
K14440	SWI/SNF-related matrix-associated actin-dependent regulator of chromatin subfamily A-like protein 1	MAG: helicase	Decreased	Purines, pyrimidines, nucleotides				3.4095	0	9.1813	9.6242	15.45	16.737	22.11	11.211	16.778
K03695	ATP-dependent Clp protease ATP-binding subunit ClpB	MAG: ATP-dependent chaperone ClpB	Decreased	Regulatory system and stress				0	0	12.624	28.07	34.932	36.152	26.8002	22.4234	19.294
K01428	urease subunit alpha	MAG: urease subunit alpha	Decreased	S and N metabolism				5.1142	3.6089	8.0337	12.03	18.137	16.737	15.41	9.173	15.939
K01890	phenylalanyl-tRNA synthetase beta chain	MAG: phenylalanine--tRNA ligase subunit beta	Decreased	Translation				0	3.6089	8.0337	11.228	20.153	14.729	16.75	9.173	14.261
K02520	translation initiation factor IF-3	MULTISPECIES: translation initiation factor IF-3	Decreased	Translation				11.933	0	8.0337	19.248	20.153	18.746	24.121	13.25	12.583
K03797	carboxyl-terminal processing protease	MULTISPECIES: S41 family peptidase;MAG: signal protein PDZ;MAG: peptidase S41	Decreased	Translation				3.4095	0	9.1814	24.8621	22.1681	20.0845	21.4402	13.25	17.6165
K04772	serine protease DegQ	PDZ domain-containing protein;MAG: serine protease	Decreased	Translation				0	0	5.7383	5.6141	15.4504	14.729	28.1402	15.2881	14.261
IKNINDAA_02085	hypothetical protein	MAG: hypothetical protein DCO99_10055	Decreased	unknown				0	0	11.477	12.832	16.794	14.059	37.521	36.692	29.361
The unique interaction response: Unique to 30Lvs27R (28 proteins)
K00826	branched-chain amino acid aminotransferase	MAG: branched chain amino acid aminotransferase	Increased	Amino acid metabolism				49.437	45.111	35.578	24.06	17.466	16.737
K02097	phycobilisome core component	MAG: allophycocyanin subunit beta	Increased	Photosynthesis				44.323	43.307	32.135	19.248	14.779	18.746
K02635	cytochrome b6	MULTISPECIES: cytochrome b6	Increased	Photosynthesis				23.866	27.067	22.953	12.832	9.4046	10.712
K05366	penicillin-binding protein 1A	MAG: penicillin-binding protein;MAG: carboxypeptidase	Decreased	Cell wall and signaling				0	0	0	2.406	10.0764	13.39
K22705	hopanoid C-2 methylase	MAG: B12-binding domain-containing radical SAM protein	Decreased	Cell wall and signaling				0	0	0	6.4161	11.42	12.72
K03147	phosphomethylpyrimidine synthase	MAG: thiamine biosynthesis protein ThiC	Decreased	Cofactor				5.1142	9.0223	11.477	16.04	37.618	19.415
K09014	Fe-S cluster assembly protein SufB	Fe-S cluster assembly protein SufB	Decreased	Cofactor				0	0	6.886	6.4161	13.435	12.051
K02492	glutamyl-tRNA reductase	glutamyl-tRNA reductase	Decreased	Photosynthesis				0	0	0	1.604	10.076	8.7035
K01955	carbamoyl-phosphate synthase large subunit	MAG: carbamoyl phosphate synthase large subunit	Decreased	Purines, pyrimidines, nucleotides				6.8189	14.436	18.363	23.258	32.244	33.475
K23269	phosphoribosylformylglycinamidine synthase subunit PurL	MAG: phosphoribosylformylglycinamidine synthase subunit PurL	Decreased	Purines, pyrimidines, nucleotides				10.228	7.2178	16.067	18.446	28.214	31.466
K03782	catalase-peroxidase	MAG: catalase/peroxidase HPI	Decreased	Regulatory system and stress				0	0	6.886	8.0201	15.45	19.415
K19788	obg-like ATPase 1	MAG: redox-regulated ATPase YchF	Decreased	Regulatory system and stress				0	0	8.0337	13.634	10.748	12.051
K00392	sulfite reductase (ferredoxin)	MAG: sulfite reductase, ferredoxin dependent	Decreased	S and N metabolism				8.5237	7.2178	13.772	19.248	22.84	23.432
K12573	ribonuclease R	MAG: organic colvent ABC transporter permease	Decreased	Transcription				18.752	12.631	18.363	33.685	38.29	30.797
K12574	ribonuclease J	MAG: ribonuclease J	Decreased	Transcription				10.228	10.827	20.658	40.903	45.68	42.178
IKNINDAA_02243	hypothetical protein	C2 family cysteine protease, partial	Decreased	Translation				6.8189	7.2178	14.92	18.446	18.809	21.424
K01414	oligopeptidase A	MAG: peptidase M3	Decreased	Translation				0	0	2.2953	3.2081	8.0611	12.72
K01869	leucyl-tRNA synthetase	MAG: leucine--tRNA ligase	Decreased	Translation				5.1142	5.4134	10.329	16.04	22.168	22.763
K01870	isoleucyl-tRNA synthetase	MAG: isoleucine--tRNA ligase	Decreased	Translation				0	3.6089	4.5907	8.0201	12.763	12.051
K01872	alanyl-tRNA synthetase	MAG: alanine--tRNA ligase	Decreased	Translation				0	0	0	7.2181	14.779	16.068
K01875	seryl-tRNA synthetase	MAG: serine--tRNA ligase	Decreased	Translation				0	5.4134	5.7383	5.6141	16.122	14.059
K03217	YidC/Oxa1 family membrane protein insertase	MULTISPECIES: membrane protein insertase YidC	Decreased	Translation				0	0	6.886	9.6242	11.42	10.042
K03218	23S rRNA (guanosine2251-2'-O)-methyltransferase	23S rRNA (guanosine(2251)-2'-O)-methyltransferase RlmB	Decreased	Translation				0	0	0	1.604	8.7328	11.381
K03545	trigger factor	MAG: trigger factor	Decreased	Translation				17.047	16.24	26.396	45.715	51.054	55.568
K06207	GTP-binding protein	MAG: translational GTPase TypA	Decreased	Cell wall and signaling				13.638	18.045	27.544	48.923	55.756	55.568
K21594	translation factor GUF1, mitochondrial	MAG: elongation factor 4	Decreased	Translation				0	0	5.7383	8.0201	14.107	14.059
IKNINDAA_01566	hypothetical protein	MAG: hypothetical protein DCO99_00625	Decreased	unknown				0	0	0	11.228	10.076	10.712
IKNINDAA_02077	hypothetical protein	PRC-barrel domain-containing protein	Decreased	unknown				3.4095	7.2178	14.92	14.436	18.809	20.085
